# Supplementary material for: The distribution of runs of homozygosity in the genome of river and swamp buffaloes reveals a history of adaptation, migration and crossbred events
Source: PubMed Central journal article supplement (PMC7912491; doi:10.1186/s12711-021-00616-3), 2021-02-27

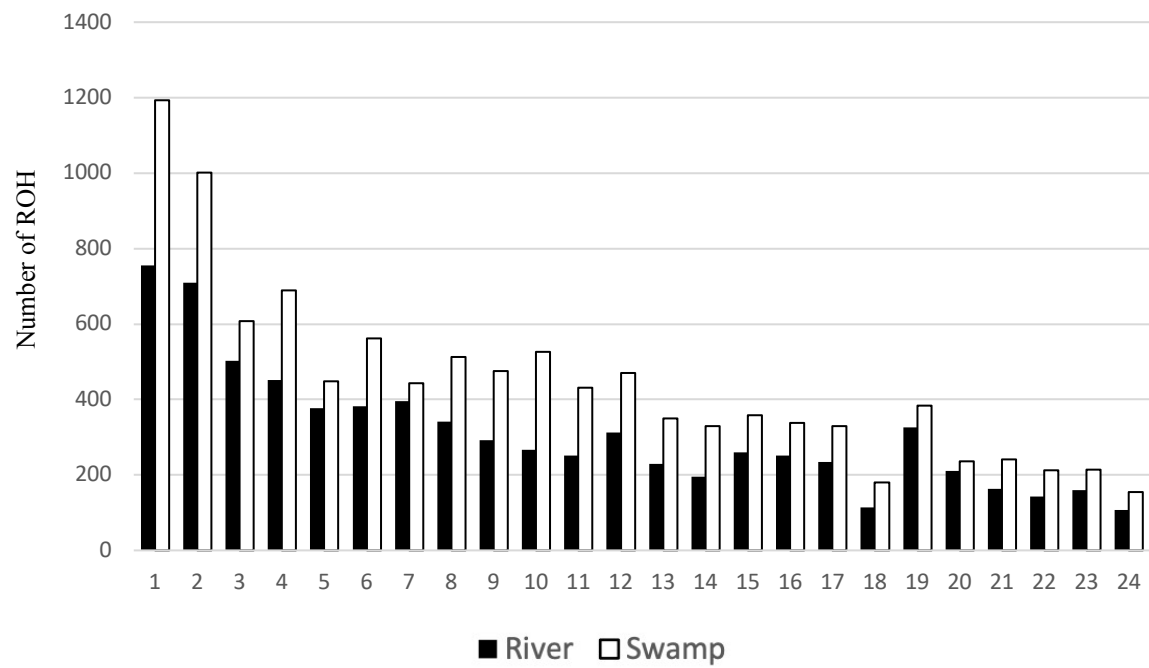

Supplement: 12711_2021_616_MOESM3_ESM.pdf [file 12711_2021_616_MOESM3_ESM.pdf]
